# Supplementary material for: Theoretical study on exohedral complexes C6H6TMB40 (TM = Sc-Ni)
Source: Royal Society of Chemistry journal article supplement (doi:10.1039/d2cp02436e), 2022-01-01
Supplement: d2cp02436e1.pdf [file d2cp02436e1.pdf]

Theoretical Study on Exohedral Complexes  $C_6H_6TMB_{40}$  (TM= Sc-Ni)

Ling Pei<sup>1</sup>, Li-Juan Zhang, Da-Zhi Li

Figure S1. Equilibrium geometries of  $BzTMB_{40}$  in each configuration. The values given correspond to their relative energies (in eV) with respect to the ground states at the PBE0/6-31G(d), PBE0/6-311+G(d) (in parenthesis) and TPSSh/6-311+G(d) (in square brackets) levels, respectively.

Figure S2. Born-Oppenheimer molecular dynamics (BOMD) of  $C_{2v} C_6H_6CrB_{40}$  at 500 K. The root-mean-square-deviation (RMSD) and maximum bond length deviation (MAXD) values (on average) are indicated in Å.

Figure S3. The main NAdO orbitals and eigenvalues of  $C_6H_6TMB_{40}$  (TM= Sc-Ni)

Figure S4. The global minimum of  $CoB_{18}^-$  and  $NiB_{40}$

Table S1 Structural and energetic properties of  $C_6H_6TMB_{40}$  (TM= Sc-Ni)

Table S2 Optimized Cartesian coordinates of  $C_6H_6TMB_{40}$  (TM= Sc-Ni) at PBE0/6-311+G(d) level

---

<sup>1</sup> Ling Pei (✉)

Department of Chemical Engineering and Safety, Binzhou University, Binzhou 256603, Shandong, People's Republic China  
e-mail: [61201@163.com](mailto:61201@163.com)

Figure S1. Equilibrium geometries of  $\text{BzTMB}_{40}$  in each configuration. The values given correspond to their relative energies (in eV) with respect to the ground states at the PBE0/6-31G(d), PBE0/6-311+G(d) (in parenthesis) and TPSSh/6-311+G(d) (in square brackets) levels, respectively.

(a)  $\text{BzScB}_{40}$

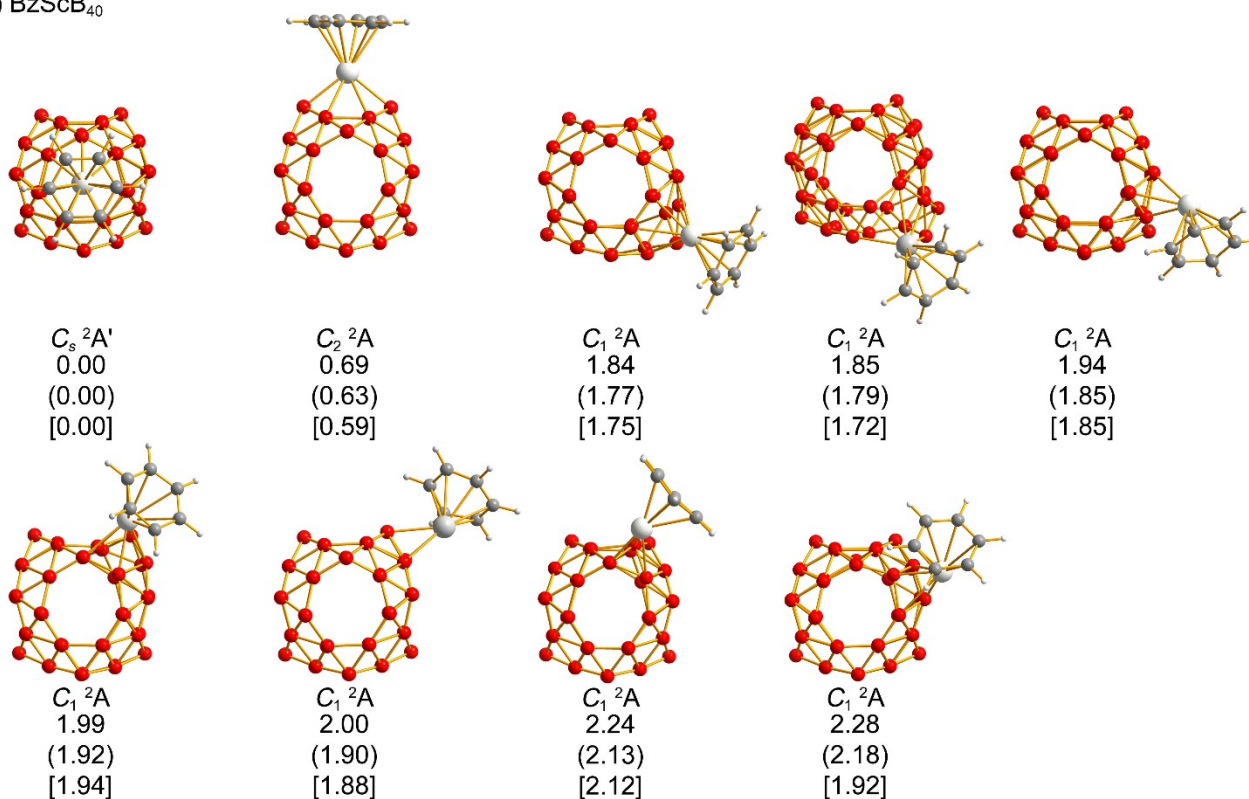

(b)  $\text{BzTiB}_{40}$

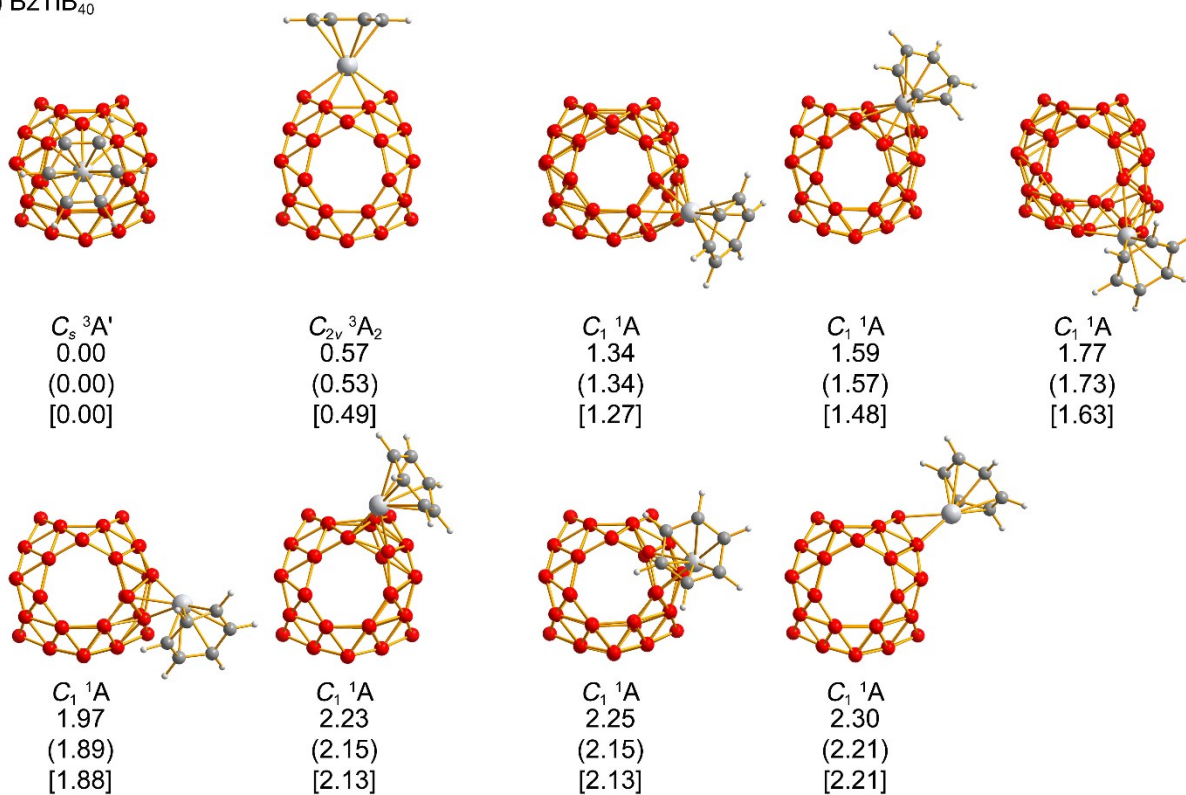

(c) BzVB<sub>40</sub>

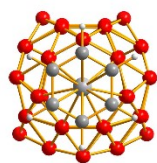

$C_s \ ^2A'$   
0.00  
(0.00)  
[0.00]

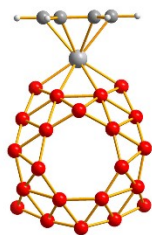

$C_{2v} \ ^2A_1$   
0.24  
(0.23)  
[0.16]

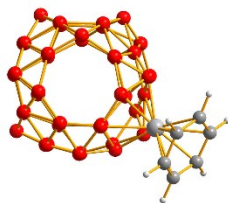

$C_1 \ ^2A$   
1.25  
(1.25)  
[1.17]

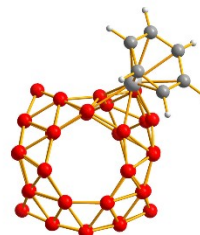

$C_1 \ ^2A$   
1.79  
(1.75)  
[1.68]

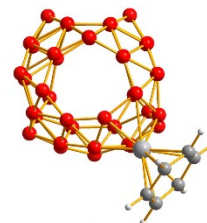

$C_1 \ ^2A$   
1.82  
(1.77)  
[1.70]

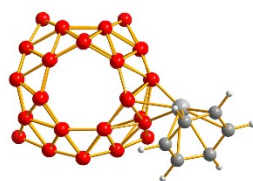

$C_1 \ ^2A$   
1.91  
(1.80)  
[1.81]

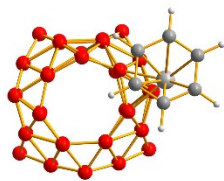

$C_1 \ ^2A$   
2.11  
(1.98)  
[1.98]

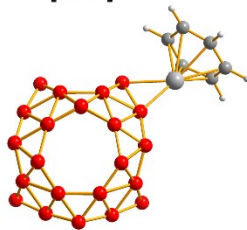

$C_1 \ ^2A$   
2.18  
(2.06)  
[2.09]

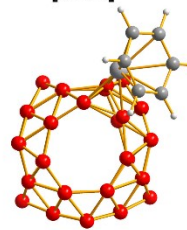

$C_1 \ ^4A$   
2.28  
(2.12)  
[2.31]

(d) BzCrB<sub>40</sub>

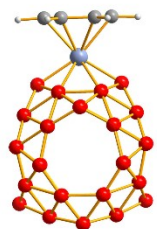

$C_{2v} \ ^1A_1$   
0.00  
(0.00)  
[0.00]

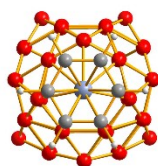

$C_s \ ^1A'$   
0.09  
(0.06)  
[0.12]

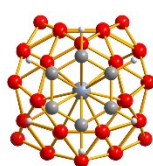

$C_s \ ^1A'$   
0.10  
(0.06)  
[0.13]

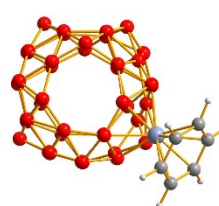

$C_1 \ ^1A$   
1.30  
(1.33)  
[1.32]

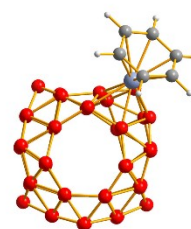

$C_1 \ ^3A$   
1.47  
(1.49)  
[1.75]

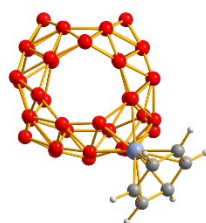

$C_1 \ ^1A$   
1.51  
(1.55)  
[1.52]

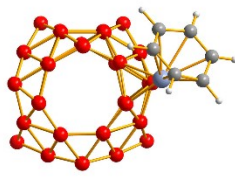

$C_1 \ ^3A$   
1.66  
(1.58)  
[1.99]

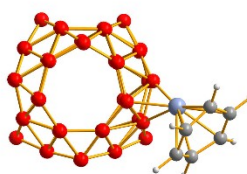

$C_1 \ ^3A$   
1.66  
(1.58)  
[1.99]

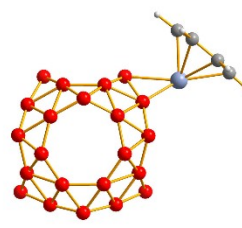

$C_1 \ ^3A$   
1.78  
(1.73)  
[2.13]

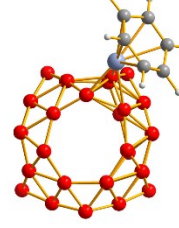

$C_1 \ ^3A$   
1.80  
(1.71)  
[2.12]

(e)  $\text{BzMnB}_{40}$

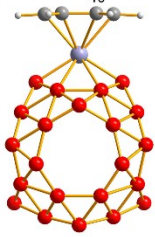

$C_{2v} \ ^2B_1$   
0.00  
(0.00)  
[0.00]

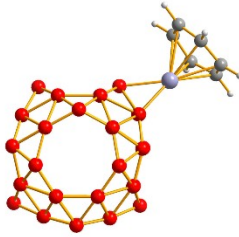

$C_1 \ ^4A$   
0.38  
(0.28)  
[0.99]

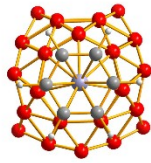

$C_s \ ^2A'$   
0.39  
(0.35)  
[0.39]

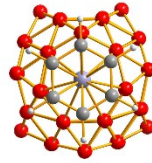

$C_s \ ^2A'$   
0.40  
(0.36)  
[0.40]

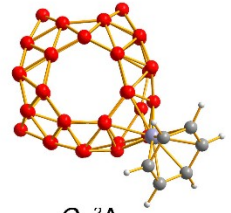

$C_1 \ ^2A$   
0.74  
(0.83)  
[0.83]

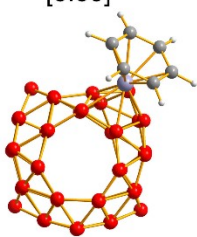

$C_1 \ ^2A$   
0.80  
(0.93)  
[0.89]

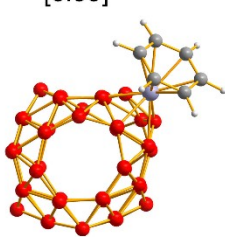

$C_1 \ ^2A$   
0.82  
(0.91)  
[0.87]

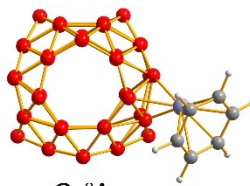

$C_1 \ ^2A$   
1.05  
(1.06)  
[1.31]

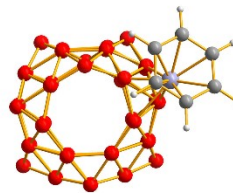

$C_1 \ ^2A$   
1.14  
(1.07)  
[1.29]

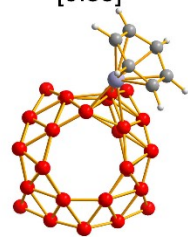

$C_1 \ ^2A$   
1.20  
(1.18)  
[1.42]

(f)  $\text{BzFeB}_{40}$

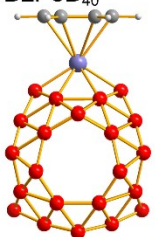

$C_{2v} \ ^3A_2$   
0.00  
(0.00)  
[0.00]

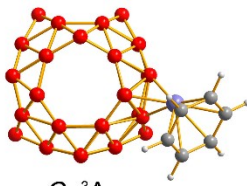

$C_1 \ ^3A$   
0.17  
(0.27)  
[0.29]

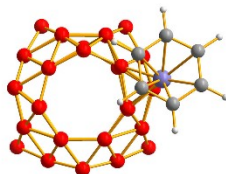

$C_1 \ ^3A$   
0.17  
(0.25)  
[0.27]

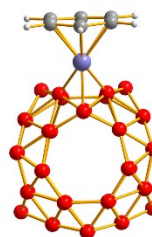

$C_s \ ^3A'$   
0.28  
(0.37)  
[0.40]

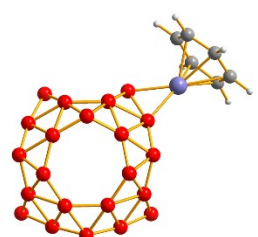

$C_s \ ^3A'$   
0.30  
(0.41)  
[0.44]

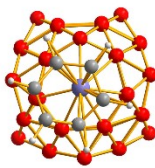

$C_1 \ ^1A$   
0.56  
(0.72)  
[0.28]

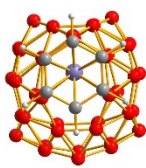

$C_s \ ^1A'$   
0.65  
(0.82)  
[0.27]

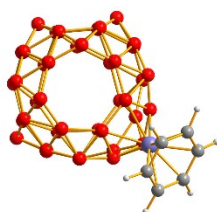

$C_1 \ ^1A$   
0.71  
(0.92)  
[0.42]

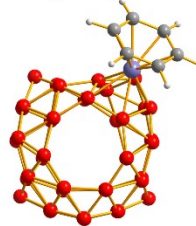

$C_1 \ ^1A$   
0.82  
(1.08)  
[0.56]

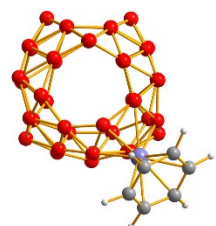

$C_1 \ ^1A$   
0.89  
(1.10)  
[0.61]



(g) BzCoB<sub>40</sub>

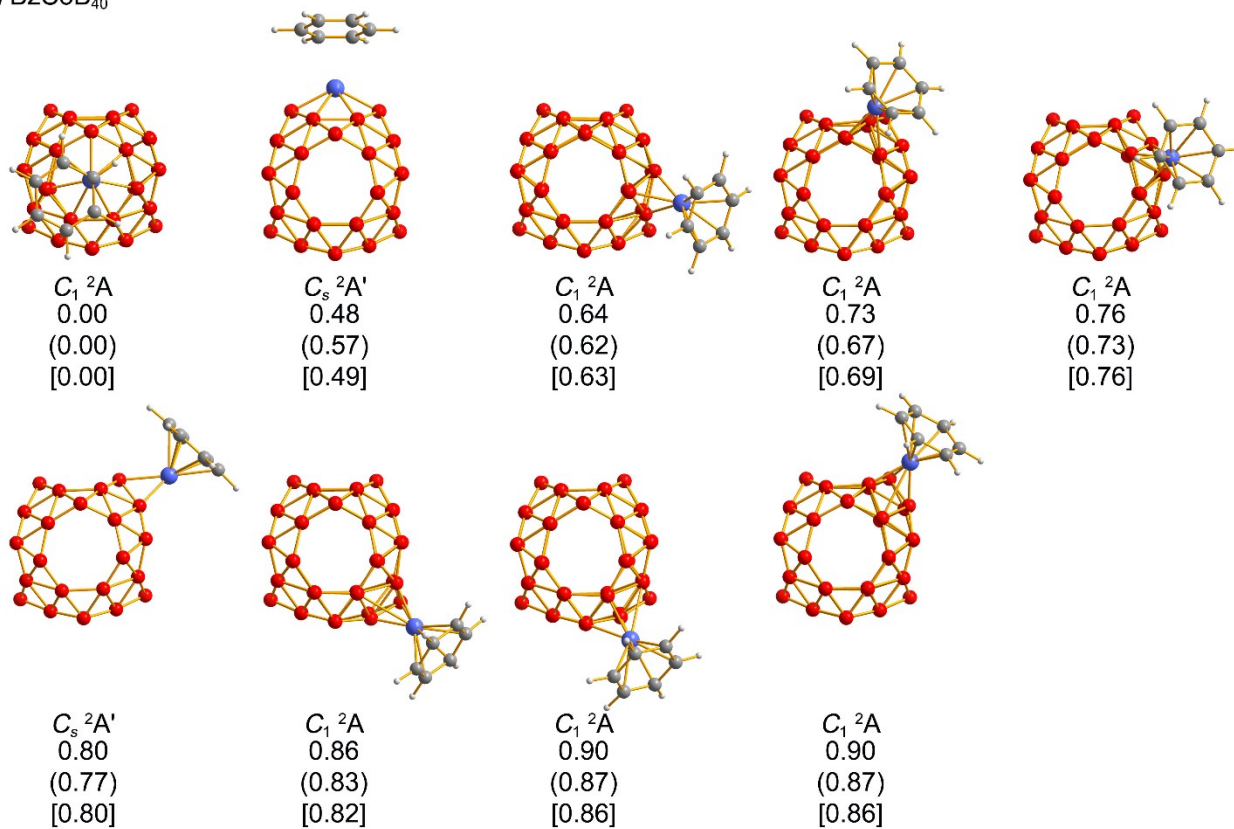

(h) BzNiB<sub>40</sub>

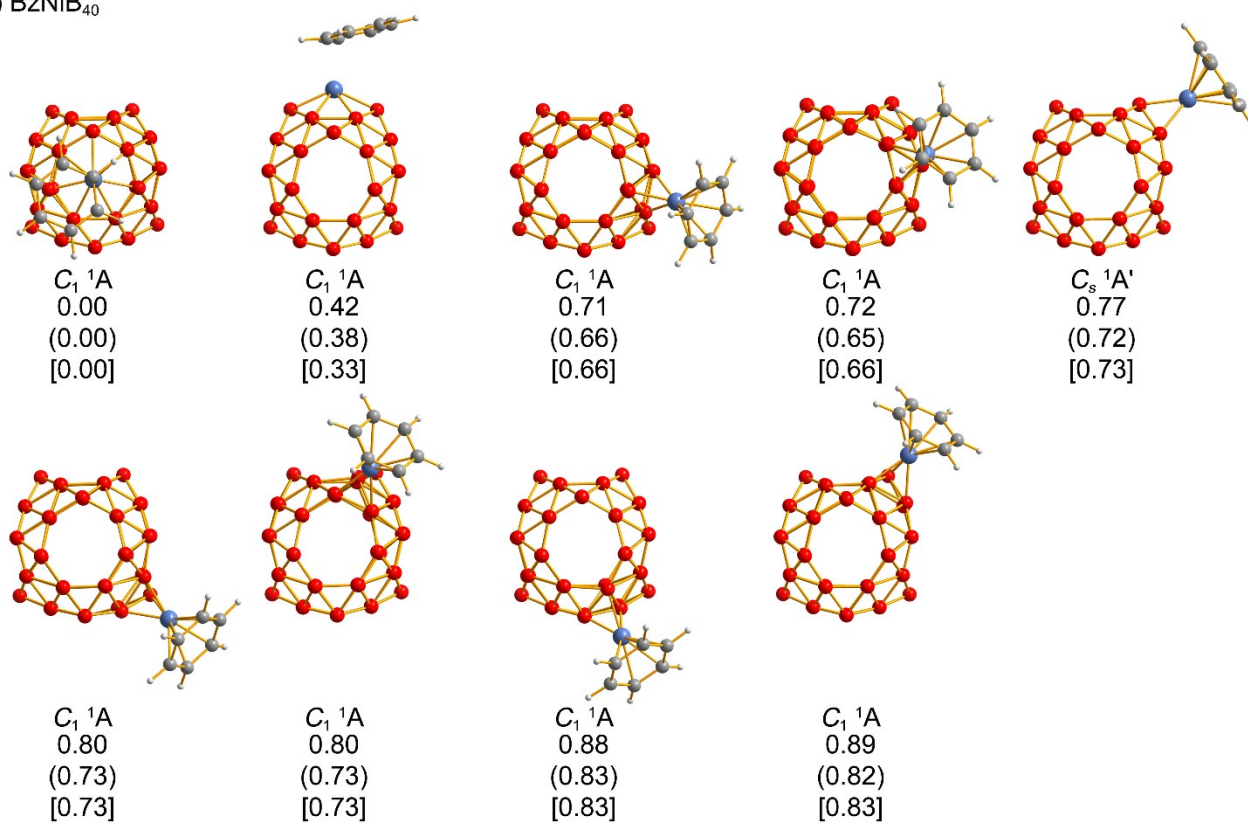

Figure S2. Born-Oppenheimer molecular dynamics (BOMD) of  $C_{2v}$   $C_6H_6CrB_{40}$  at 500 K. The root-mean-square-deviation (RMSD) and maximum bond length deviation (MAXD) values (on average) are indicated in Å.

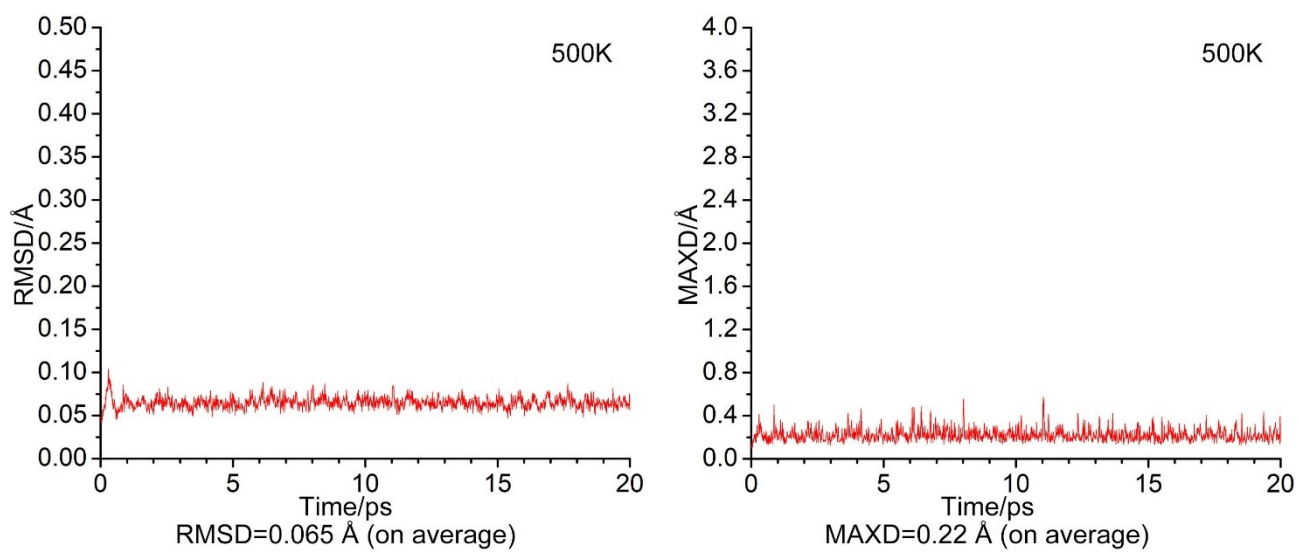

Figure S3. The main NAdO orbitals and eigenvalues of  $C_6H_6TM B_{40}$  (TM= Sc-Ni) (isovalue=0.02).

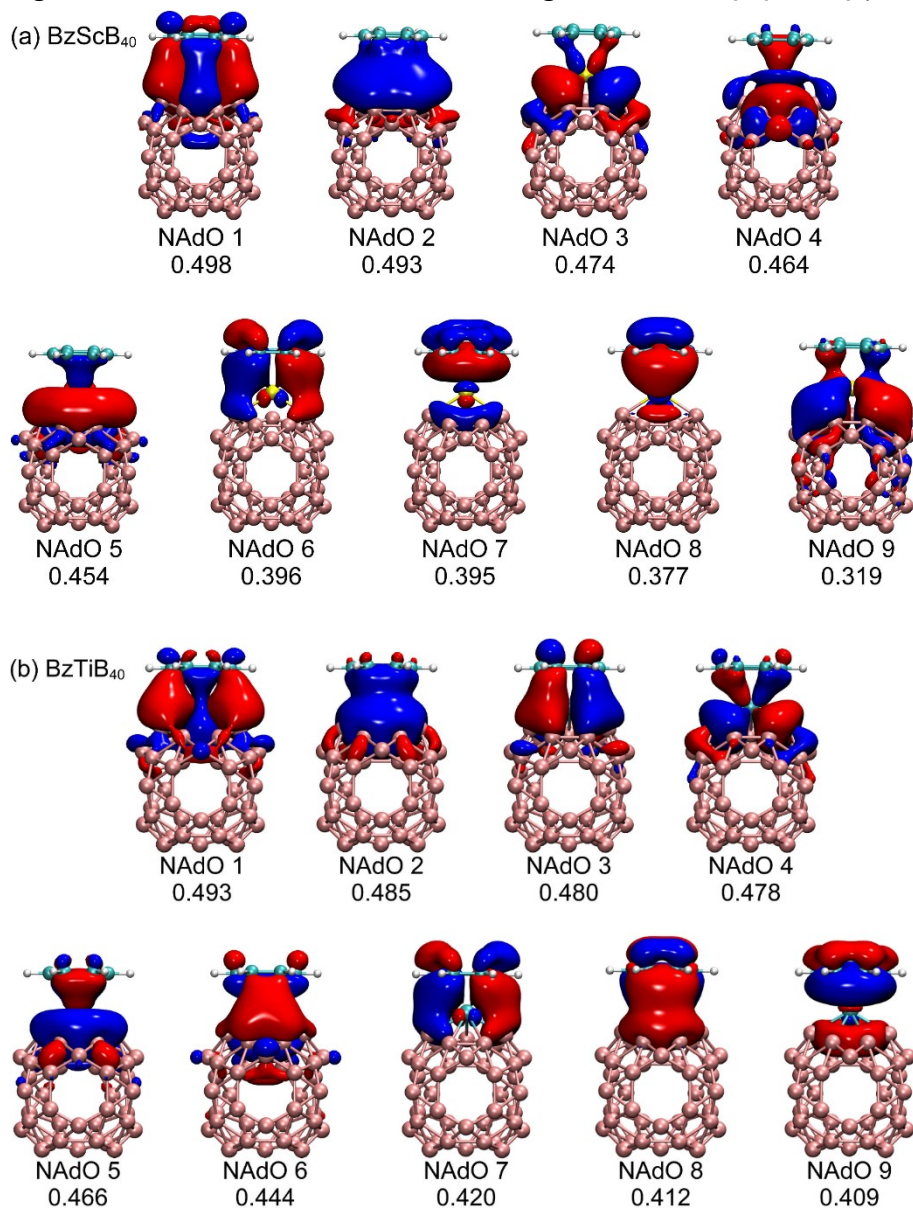

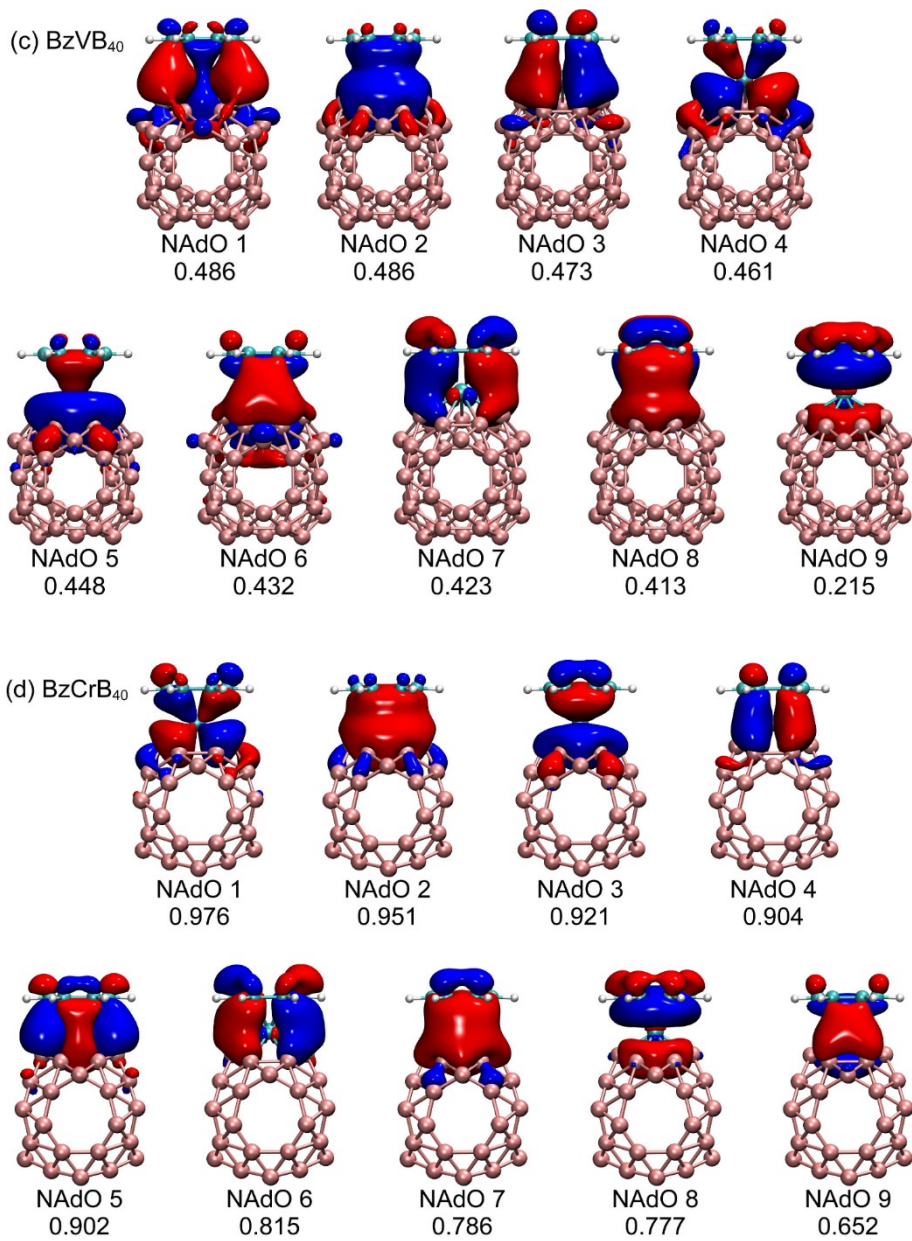



(e) BzMnB<sub>40</sub>

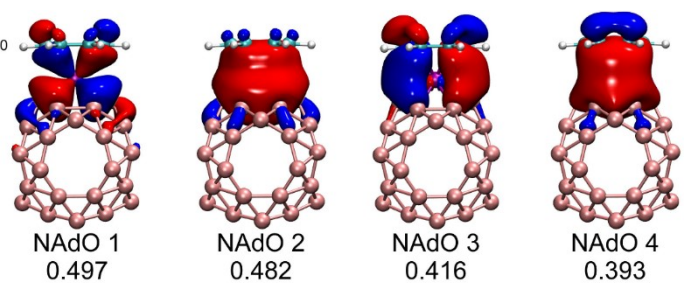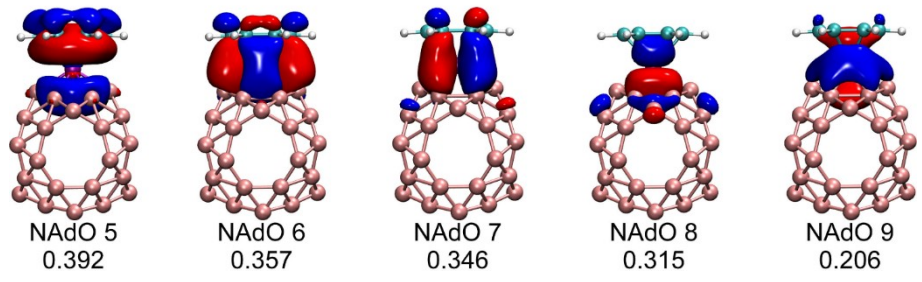

(f) BzFeB<sub>40</sub>

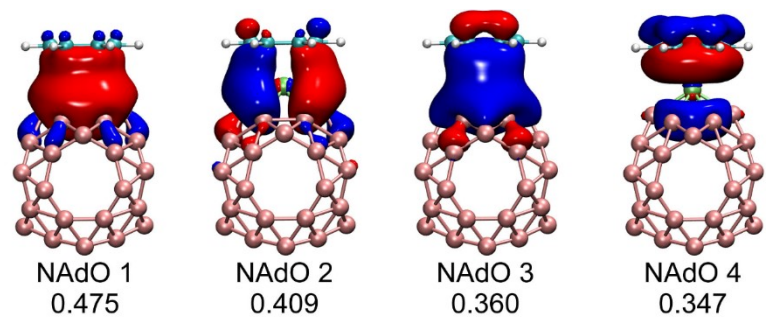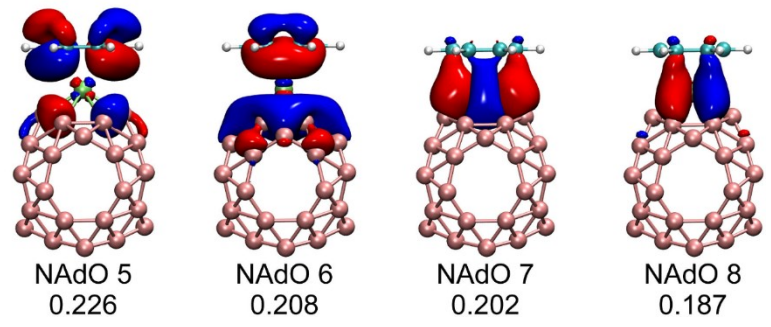

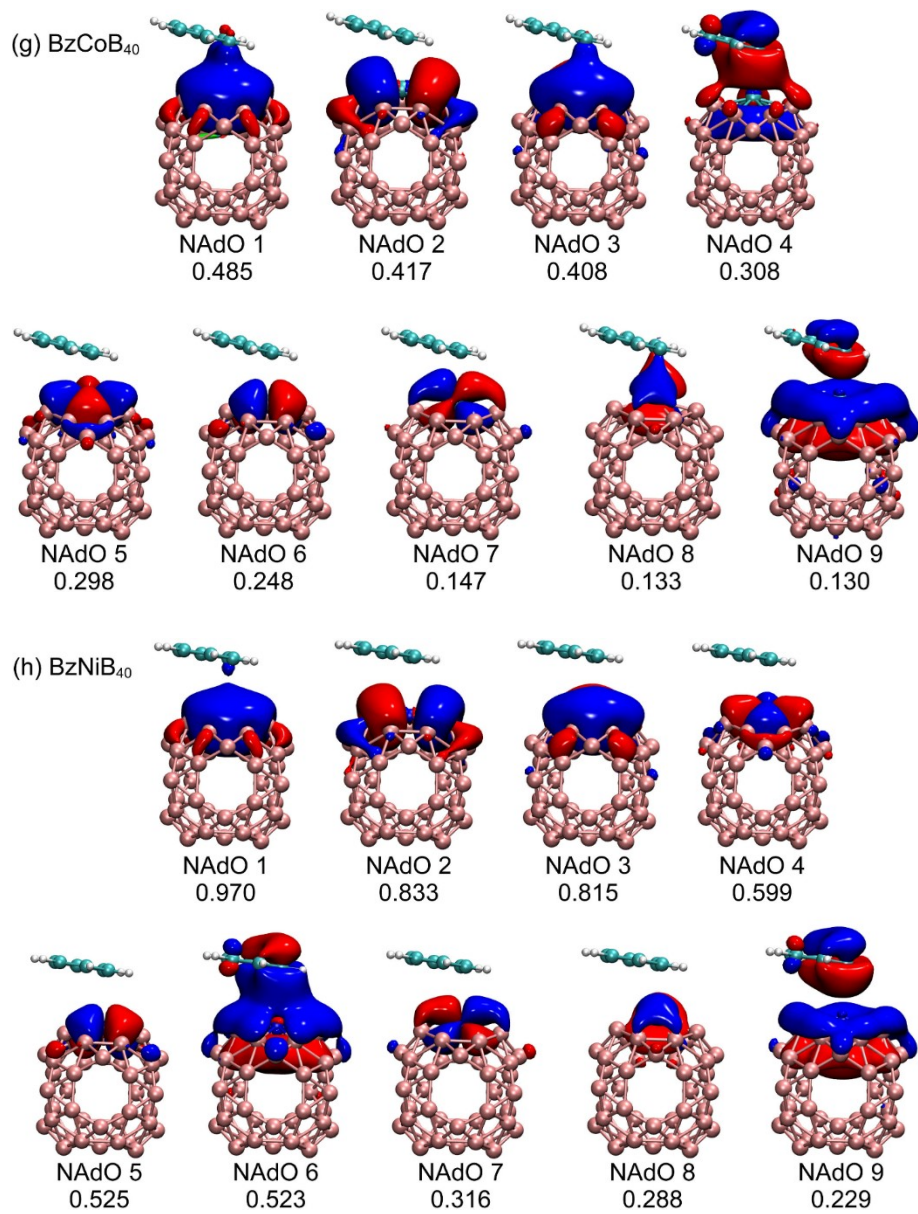

Figure S4. The global minimum of  $\text{CoB}_{18}^-$  and  $\text{NiB}_{40}$

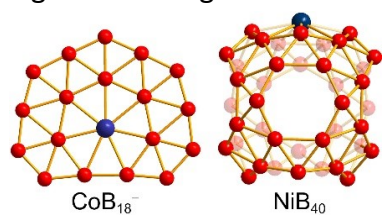

Table S1 Structural and energetic properties of C<sub>6</sub>H<sub>6</sub>TM<sub>B</sub><sub>40</sub> (TM= Sc-Ni)

| TM   | site           | M <sup>a</sup> | PGs <sup>a</sup> | State                       | R <sub>TM-B<sub>40</sub></sub> <sup>a</sup> | R <sub>TM-B<sub>z</sub></sub> <sup>a</sup> | E <sub>b</sub> | NICS  | Δ    | Q <sub>B<sub>40</sub></sub> | Q <sub>TM</sub> | Q <sub>B<sub>z</sub></sub> | Electron configuration | Mayor | Fuzzy bond order | R <sub>B-B(B<sub>40</sub>)</sub> <sup>b</sup> | R <sub>C-C(B<sub>z</sub>)</sub> <sup>c</sup> |
|------|----------------|----------------|------------------|-----------------------------|---------------------------------------------|--------------------------------------------|----------------|-------|------|-----------------------------|-----------------|----------------------------|------------------------|-------|------------------|-----------------------------------------------|----------------------------------------------|
| 1-Sc | η <sup>7</sup> | 2              | C <sub>s</sub>   | <sup>2</sup> A'             | 1.53                                        | 2.13                                       | 5.47           | 44.89 | 1.32 | -0.98                       | 0.96            | 0.03                       | [core]4S(0.17)3d(1.79) | 4.40  | 9.59             | 1.66-1.69                                     | 1.39-1.41                                    |
| 2-Ti | η <sup>7</sup> | 3              | C <sub>s</sub>   | <sup>3</sup> A''            | 1.40                                        | 1.89                                       | 6.05           | 38.75 | 1.63 | -0.30                       | 0.23            | 0.08                       | [core]4S(0.17)3d(3.48) | 5.61  | 10.02            | 1.65-1.69                                     | 1.40-1.42                                    |
| 3-V  | η <sup>7</sup> | 2              | C <sub>s</sub>   | <sup>2</sup> A'             | 1.32                                        | 1.74                                       | 5.31           | 44.63 | 2.08 | 0.07                        | -0.25           | 0.18                       | [core]4S(0.18)3d(4.94) | 6.31  | 10.07            | 1.65-1.70                                     | 1.41-1.43                                    |
| 4-Cr | η <sup>6</sup> | 1              | C <sub>2v</sub>  | <sup>1</sup> A <sub>1</sub> | 1.34                                        | 1.64                                       | 3.14           | 49.29 | 2.63 | 0.39                        | -0.73           | 0.33                       | [core]4S(0.20)3d(6.39) | 6.84  | 9.53             | 1.68-1.78                                     | 1.41                                         |
| 5-Mn | η <sup>6</sup> | 2              | C <sub>2v</sub>  | <sup>2</sup> B <sub>1</sub> | 1.34                                        | 1.66                                       | 3.45           | 43.98 | 2.13 | 0.23                        | -0.56           | 0.33                       | [core]4S(0.18)3d(7.26) | 5.80  | 9.26             | 1.69-1.77                                     | 1.41-1.42                                    |
| 6-Fe | η <sup>6</sup> | 3              | C <sub>2v</sub>  | <sup>3</sup> A <sub>2</sub> | 1.36                                        | 1.92                                       | 3.81           | 46.05 | 2.83 | -0.23                       | 0.09            | 0.15                       | [core]4S(0.15)3d(7.66) | 4.49  | 7.73             | 1.68-1.80                                     | 1.40-1.41                                    |
| 7-Co | η <sup>7</sup> | 2              | C <sub>1</sub>   | <sup>2</sup> A              | 0.85                                        | 2.92                                       | 3.96           | 46.04 | 2.92 | -0.48                       | 0.41            | 0.07                       | [core]4S(0.15)3d(8.40) | 5.18  | 7.05             | 1.67-1.75                                     | 1.39-1.40                                    |
| 8-Ni | η <sup>7</sup> | 1              | C <sub>1</sub>   | <sup>1</sup> A              | 1.08                                        | 2.68                                       | 4.38           | 43.78 | 2.89 | -0.47                       | 0.45            | 0.02                       | [core]4S(0.16)3d(9.36) | 4.84  | 6.56             | 1.59-1.76                                     | 1.39-1.40                                    |

a: Spin multiplicity M, point group symmetry PGs, the distances of TM-B<sub>40</sub> and TM-B<sub>z</sub> (Å), binding energy E<sub>b</sub> (eV), HOMO-LUMO gap Δ (eV)

b: Bond length of B-B in B<sub>40</sub> for those B atoms directly bonded to TM.

c: Bond length of C-C in C<sub>6</sub>H<sub>6</sub>.



Table S2 Optimized Cartesian coordinates of C<sub>6</sub>H<sub>6</sub>TMB<sub>40</sub> (TM= Sc-Ni) at PBE0/6-311+G(d) level

(1) C<sub>6</sub>H<sub>6</sub>ScB<sub>40</sub>

|   |          |          |          |
|---|----------|----------|----------|
| B | -0.47518 | -4.07762 | 1.76777  |
| B | 2.82066  | -1.40992 | 1.66719  |
| B | 1.11242  | -3.75077 | 1.37212  |
| B | -0.30078 | 1.53782  | -1.88255 |
| B | -2.81496 | 0.45976  | 0.00000  |
| B | -1.96398 | -1.25808 | 2.59906  |
| B | 1.68413  | -0.48858 | -2.37272 |
| B | -1.22544 | -2.67375 | -2.34807 |
| B | -0.47518 | -4.07762 | -1.76777 |
| B | 2.82066  | -1.40992 | -1.66719 |
| B | 1.11242  | -3.75077 | -1.37212 |
| B | 0.45000  | 0.41583  | 2.78670  |
| B | 1.24749  | 1.03161  | 1.43518  |
| B | 1.24749  | 1.03161  | -1.43518 |
| B | -1.53991 | 1.10359  | -0.84491 |
| B | -1.74338 | -3.66628 | 0.87759  |
| B | 1.64853  | -2.26692 | -2.37026 |
| B | -1.53991 | 1.10359  | 0.84491  |
| B | 2.01798  | 1.33368  | 0.00000  |
| B | 0.33170  | -3.09613 | 2.72478  |
| B | 1.64853  | -2.26692 | 2.37026  |
| B | 1.68413  | -0.48858 | 2.37272  |
| B | -1.10970 | 0.10100  | -2.33872 |
| B | -1.22544 | -2.67375 | 2.34807  |
| B | -1.10970 | 0.10100  | 2.33872  |
| B | 2.49978  | -0.01649 | -0.85517 |
| B | 2.49978  | -0.01649 | 0.85517  |
| B | -0.30078 | 1.53782  | 1.88255  |
| B | -2.49123 | -0.34191 | 1.37379  |
| B | -1.96398 | -1.25808 | -2.59906 |
| B | -1.74338 | -3.66628 | -0.87759 |
| B | 2.46376  | -2.79393 | -0.87609 |
| B | 2.46376  | -2.79393 | 0.87609  |
| B | -2.53421 | -2.13447 | 1.36146  |
| B | 0.45000  | 0.41583  | -2.78670 |
| B | 1.90123  | -4.05914 | 0.00000  |
| B | -2.49123 | -0.34191 | -1.37379 |
| B | -2.90764 | -2.95215 | 0.00000  |
| B | 0.33170  | -3.09613 | -2.72478 |
| B | -2.53421 | -2.13447 | -1.36146 |
| C | -0.03022 | 4.85504  | -1.40972 |
| C | 1.18067  | 4.96575  | -0.69684 |

|    |          |         |          |
|----|----------|---------|----------|
| C  | 1.18067  | 4.96575 | 0.69684  |
| C  | -0.03022 | 4.85504 | 1.40972  |
| C  | -1.24999 | 4.87127 | 0.69335  |
| C  | -1.24999 | 4.87127 | -0.69335 |
| H  | -0.03176 | 4.84668 | -2.49226 |
| H  | 2.12209  | 5.00837 | -1.23391 |
| H  | 2.12209  | 5.00837 | 1.23391  |
| H  | -0.03176 | 4.84668 | 2.49226  |
| H  | -2.18964 | 4.83475 | 1.23380  |
| H  | -2.18964 | 4.83475 | -1.23380 |
| Sc | 0.07921  | 2.77405 | 0.00000  |

(2) C<sub>6</sub>H<sub>6</sub>TiB<sub>40</sub>

|   |             |             |             |
|---|-------------|-------------|-------------|
| B | -0.41965800 | -4.00997200 | 1.75371600  |
| B | 2.82794400  | -1.29181700 | 1.66985600  |
| B | 1.17511600  | -3.66238800 | 1.39385800  |
| B | -0.34561500 | 1.57448100  | -1.87206000 |
| B | -2.82691700 | 0.44824600  | 0.00000000  |
| B | -1.95099300 | -1.23349200 | 2.61242700  |
| B | 1.66191000  | -0.42735500 | -2.38620700 |
| B | -1.21596000 | -2.65038700 | -2.37108800 |
| B | -0.41965800 | -4.00997200 | -1.75371600 |
| B | 2.82794400  | -1.29181700 | -1.66985600 |
| B | 1.17511600  | -3.66238800 | -1.39385800 |
| B | 0.41684100  | 0.48347900  | 2.77910000  |
| B | 1.20843600  | 1.13628500  | 1.43870300  |
| B | 1.20843600  | 1.13628500  | -1.43870300 |
| B | -1.59163500 | 1.13675700  | -0.84643700 |
| B | -1.70722700 | -3.63036600 | 0.88150100  |
| B | 1.66655800  | -2.18255700 | -2.36616000 |
| B | -1.59163500 | 1.13675700  | 0.84643700  |
| B | 1.97013800  | 1.39703000  | 0.00000000  |
| B | 0.36074500  | -3.02888100 | 2.72938000  |
| B | 1.66655800  | -2.18255700 | 2.36616000  |
| B | 1.66191000  | -0.42735500 | 2.38620700  |
| B | -1.15200200 | 0.16164700  | -2.34972900 |
| B | -1.21596000 | -2.65038700 | 2.37108800  |
| B | -1.15200200 | 0.16164700  | 2.34972900  |
| B | 2.47468400  | 0.09647400  | -0.87066100 |
| B | 2.47468400  | 0.09647400  | 0.87066100  |
| B | -0.34561500 | 1.57448100  | 1.87206000  |
| B | -2.49986600 | -0.35018700 | 1.37713000  |
| B | -1.95099300 | -1.23349200 | -2.61242700 |
| B | -1.70722700 | -3.63036600 | -0.88150100 |

|    |             |             |             |
|----|-------------|-------------|-------------|
| B  | 2.50764600  | -2.68724200 | -0.88098000 |
| B  | 2.50764600  | -2.68724200 | 0.88098000  |
| B  | -2.52873200 | -2.13198600 | 1.39091300  |
| B  | 0.41684100  | 0.48347900  | -2.77910000 |
| B  | 1.94153400  | -3.94029200 | 0.00000000  |
| B  | -2.49986600 | -0.35018700 | -1.37713000 |
| B  | -2.86793000 | -2.91905200 | 0.00000000  |
| B  | 0.36074500  | -3.02888100 | -2.72938000 |
| B  | -2.52873200 | -2.13198600 | -1.39091300 |
| C  | -1.22676200 | 4.59808400  | -0.69945800 |
| C  | -0.00238500 | 4.57190100  | -1.41067600 |
| C  | 1.21491700  | 4.60105900  | -0.70566500 |
| C  | 1.21491700  | 4.60105900  | 0.70566500  |
| C  | -0.00238500 | 4.57190100  | 1.41067600  |
| C  | -1.22676200 | 4.59808400  | 0.69945800  |
| H  | -2.16473100 | 4.57280500  | -1.24204900 |
| H  | -0.00520200 | 4.56597800  | -2.49385900 |
| H  | 2.15506500  | 4.58816700  | -1.24471600 |
| H  | 2.15506500  | 4.58816700  | 1.24471600  |
| H  | -0.00520200 | 4.56597800  | 2.49385900  |
| H  | -2.16473100 | 4.57280500  | 1.24204900  |
| Ti | 0.01065700  | 2.69722500  | 0.00000000  |

(3) C<sub>6</sub>H<sub>6</sub>VB<sub>40</sub>

|   |             |             |             |
|---|-------------|-------------|-------------|
| B | -0.37271800 | -3.96881100 | 1.74017200  |
| B | 2.83003900  | -1.21019500 | 1.66781000  |
| B | 1.23276500  | -3.60939900 | 1.41872800  |
| B | -0.38952100 | 1.58906900  | -1.85585800 |
| B | -2.83789300 | 0.42121600  | 0.00000000  |
| B | -1.92977400 | -1.22665800 | 2.61800300  |
| B | 1.64879700  | -0.40056300 | -2.40278800 |
| B | -1.20884600 | -2.65170600 | -2.39387700 |
| B | -0.37271800 | -3.96881100 | -1.74017200 |
| B | 2.83003900  | -1.21019500 | -1.66781000 |
| B | 1.23276500  | -3.60939900 | -1.41872800 |
| B | 0.39285700  | 0.52014100  | 2.74984300  |
| B | 1.17796500  | 1.23124300  | 1.42813200  |
| B | 1.17796500  | 1.23124300  | -1.42813200 |
| B | -1.63979900 | 1.13948100  | -0.84941700 |
| B | -1.67901500 | -3.62011700 | 0.88802900  |
| B | 1.68557900  | -2.13746700 | -2.36382300 |
| B | -1.63979900 | 1.13948100  | 0.84941700  |
| B | 1.96096200  | 1.44716700  | 0.00000000  |
| B | 0.38542500  | -2.98981200 | 2.73312400  |

|   |             |             |             |
|---|-------------|-------------|-------------|
| B | 1.68557900  | -2.13746700 | 2.36382300  |
| B | 1.64879700  | -0.40056300 | 2.40278800  |
| B | -1.19408700 | 0.20629700  | -2.34568800 |
| B | -1.20884600 | -2.65170600 | 2.39387700  |
| B | -1.19408700 | 0.20629700  | 2.34568800  |
| B | 2.45086200  | 0.17681100  | -0.88773400 |
| B | 2.45086200  | 0.17681100  | 0.88773400  |
| B | -0.38952100 | 1.58906900  | 1.85585800  |
| B | -2.51205700 | -0.38440400 | 1.37723700  |
| B | -1.92977400 | -1.22665800 | -2.61800300 |
| B | -1.67901500 | -3.62011700 | -0.88802900 |
| B | 2.54599400  | -2.62017400 | -0.88538000 |
| B | 2.54599400  | -2.62017400 | 0.88538000  |
| B | -2.52081100 | -2.15144200 | 1.41554400  |
| B | 0.39285700  | 0.52014100  | -2.74984300 |
| B | 1.96867000  | -3.85995600 | 0.00000000  |
| B | -2.51205700 | -0.38440400 | -1.37723700 |
| B | -2.83233400 | -2.90848400 | 0.00000000  |
| B | 0.38542500  | -2.98981200 | -2.73312400 |
| B | -2.52081100 | -2.15144200 | -1.41554400 |
| C | -0.72081400 | 4.36800200  | -1.22112200 |
| C | 0.70261600  | 4.40088600  | -1.22055700 |
| C | 1.39713900  | 4.44990400  | 0.00000000  |
| C | 0.70261600  | 4.40088600  | 1.22055700  |
| C | -0.72081400 | 4.36800200  | 1.22112200  |
| C | -1.42365300 | 4.38954600  | 0.00000000  |
| H | -1.26112100 | 4.34705200  | -2.15972700 |
| H | 1.24582700  | 4.37112300  | -2.15723100 |
| H | 2.48150200  | 4.43458800  | 0.00000000  |
| H | 1.24582700  | 4.37112300  | 2.15723100  |
| H | -1.26112100 | 4.34705200  | 2.15972700  |
| H | -2.50624500 | 4.33158900  | 0.00000000  |
| V | 0.00431400  | 2.65702000  | 0.00000000  |

(4)  $C_6H_6CrB_{40}$

|   |             |             |             |
|---|-------------|-------------|-------------|
| B | -2.72357300 | 1.73871100  | -1.65911500 |
| B | 0.00000000  | 1.75090200  | 1.66520200  |
| B | -2.33805700 | 1.37538500  | -0.06566500 |
| B | 2.72357300  | -1.73871100 | -1.65911500 |
| B | 1.68418500  | 0.00000000  | -4.14192400 |
| B | 0.00000000  | 2.62992800  | -3.24925600 |
| B | 0.86674600  | -2.33759600 | 0.41899100  |
| B | -1.39823900 | -2.36312000 | -2.48471300 |
| B | -2.72357300 | -1.73871100 | -1.65911500 |



|    |             |             |             |
|----|-------------|-------------|-------------|
| B  | 0.00000000  | -1.75090200 | 1.66520200  |
| B  | -2.33805700 | -1.37538500 | -0.06566500 |
| B  | 1.72294200  | 2.69541400  | -0.88988200 |
| B  | 2.33805700  | 1.37538500  | -0.06566500 |
| B  | 2.33805700  | -1.37538500 | -0.06566500 |
| B  | 2.36460900  | -0.87644400 | -2.95413700 |
| B  | -2.36460900 | 0.87644400  | -2.95413700 |
| B  | -0.86674600 | -2.33759600 | 0.41899100  |
| B  | 2.36460900  | 0.87644400  | -2.95413700 |
| B  | 2.64289400  | 0.00000000  | 0.70912700  |
| B  | -1.72294200 | 2.69541400  | -0.88988200 |
| B  | -0.86674600 | 2.33759600  | 0.41899100  |
| B  | 0.86674600  | 2.33759600  | 0.41899100  |
| B  | 1.39823900  | -2.36312000 | -2.48471300 |
| B  | -1.39823900 | 2.36312000  | -2.48471300 |
| B  | 1.39823900  | 2.36312000  | -2.48471300 |
| B  | 1.40420200  | -0.88773900 | 1.33870600  |
| B  | 1.40420200  | 0.88773900  | 1.33870600  |
| B  | 2.72357300  | 1.73871100  | -1.65911500 |
| B  | 0.88674500  | 1.39022100  | -3.81797000 |
| B  | 0.00000000  | -2.62992800 | -3.24925600 |
| B  | -2.36460900 | -0.87644400 | -2.95413700 |
| B  | -1.40420200 | -0.88773900 | 1.33870600  |
| B  | -1.40420200 | 0.88773900  | 1.33870600  |
| B  | -0.88674500 | 1.39022100  | -3.81797000 |
| B  | 1.72294200  | -2.69541400 | -0.88988200 |
| B  | -2.64289400 | 0.00000000  | 0.70912700  |
| B  | 0.88674500  | -1.39022100 | -3.81797000 |
| B  | -1.68418500 | 0.00000000  | -4.14192400 |
| B  | -1.72294200 | -2.69541400 | -0.88988200 |
| B  | -0.88674500 | -1.39022100 | -3.81797000 |
| Cr | 0.00000000  | 0.00000000  | 2.78476000  |
| C  | 1.22551600  | -0.70417800 | 4.42341800  |
| C  | 0.00000000  | -1.40630200 | 4.43210000  |
| C  | -1.22551600 | -0.70417800 | 4.42341800  |
| C  | -1.22551600 | 0.70417800  | 4.42341800  |
| C  | 0.00000000  | 1.40630200  | 4.43210000  |
| C  | 1.22551600  | 0.70417800  | 4.42341800  |
| H  | 2.16221900  | -1.24738900 | 4.37213200  |
| H  | 0.00000000  | -2.48987100 | 4.38708600  |
| H  | -2.16221900 | -1.24738900 | 4.37213200  |
| H  | -2.16221900 | 1.24738900  | 4.37213200  |
| H  | 0.00000000  | 2.48987100  | 4.38708600  |
| H  | 2.16221900  | 1.24738900  | 4.37213200  |

(5) C<sub>6</sub>H<sub>6</sub>MnB<sub>40</sub>

|   |             |             |             |
|---|-------------|-------------|-------------|
| B | -2.72780800 | 1.74288100  | -1.67094400 |
| B | 0.00000000  | 1.75405300  | 1.63897800  |
| B | -2.34913300 | 1.37303400  | -0.08585400 |
| B | 2.72780800  | -1.74288100 | -1.67094400 |
| B | 1.68629900  | 0.00000000  | -4.14967200 |
| B | 0.00000000  | 2.63045200  | -3.25525400 |
| B | 0.88716100  | -2.34152800 | 0.42003400  |
| B | -1.39726300 | -2.36411100 | -2.48966500 |
| B | -2.72780800 | -1.74288100 | -1.67094400 |
| B | 0.00000000  | -1.75405300 | 1.63897800  |
| B | -2.34913300 | -1.37303400 | -0.08585400 |
| B | 1.73153700  | 2.70448700  | -0.89476900 |
| B | 2.34913300  | 1.37303400  | -0.08585400 |
| B | 2.34913300  | -1.37303400 | -0.08585400 |
| B | 2.36914200  | -0.87728700 | -2.96631600 |
| B | -2.36914200 | 0.87728700  | -2.96631600 |
| B | -0.88716100 | -2.34152800 | 0.42003400  |
| B | 2.36914200  | 0.87728700  | -2.96631600 |
| B | 2.64277900  | 0.00000000  | 0.70727600  |
| B | -1.73153700 | 2.70448700  | -0.89476900 |
| B | -0.88716100 | 2.34152800  | 0.42003400  |
| B | 0.88716100  | 2.34152800  | 0.42003400  |
| B | 1.39726300  | -2.36411100 | -2.48966500 |
| B | -1.39726300 | 2.36411100  | -2.48966500 |
| B | 1.39726300  | 2.36411100  | -2.48966500 |
| B | 1.40740000  | -0.88662400 | 1.31207400  |
| B | 1.40740000  | 0.88662400  | 1.31207400  |
| B | 2.72780800  | 1.74288100  | -1.67094400 |
| B | 0.88676200  | 1.38716200  | -3.82053800 |
| B | 0.00000000  | -2.63045200 | -3.25525400 |
| B | -2.36914200 | -0.87728700 | -2.96631600 |
| B | -1.40740000 | -0.88662400 | 1.31207400  |
| B | -1.40740000 | 0.88662400  | 1.31207400  |
| B | -0.88676200 | 1.38716200  | -3.82053800 |
| B | 1.73153700  | -2.70448700 | -0.89476900 |
| B | -2.64277900 | 0.00000000  | 0.70727600  |
| B | 0.88676200  | -1.38716200 | -3.82053800 |
| B | -1.68629900 | 0.00000000  | -4.14967200 |
| B | -1.73153700 | -2.70448700 | -0.89476900 |
| B | -0.88676200 | -1.38716200 | -3.82053800 |
| C | 1.23116800  | -0.70026800 | 4.43314100  |
| C | 0.00000000  | -1.39470600 | 4.40071600  |

|    |             |             |            |
|----|-------------|-------------|------------|
| C  | -1.23116800 | -0.70026800 | 4.43314100 |
| C  | -1.23116800 | 0.70026800  | 4.43314100 |
| C  | 0.00000000  | 1.39470600  | 4.40071600 |
| C  | 1.23116800  | 0.70026800  | 4.43314100 |
| H  | 2.16499300  | -1.25001100 | 4.39875600 |
| H  | 0.00000000  | -2.47786900 | 4.34334700 |
| H  | -2.16499300 | -1.25001100 | 4.39875600 |
| H  | -2.16499300 | 1.25001100  | 4.39875600 |
| H  | 0.00000000  | 2.47786900  | 4.34334700 |
| H  | 2.16499300  | 1.25001100  | 4.39875600 |
| Mn | 0.00000000  | 0.00000000  | 2.76082300 |

(6) C<sub>6</sub>H<sub>6</sub>FeB<sub>40</sub>

|   |             |             |             |
|---|-------------|-------------|-------------|
| B | -2.71749400 | 1.73280700  | -1.72324700 |
| B | 0.00000000  | 1.76713800  | 1.59313600  |
| B | -2.34192400 | 1.38069200  | -0.13107900 |
| B | 2.71749400  | -1.73280700 | -1.72324700 |
| B | 1.68190200  | 0.00000000  | -4.21391300 |
| B | 0.00000000  | 2.63328100  | -3.32198600 |
| B | 0.87432000  | -2.35416700 | 0.35267900  |
| B | -1.39600200 | -2.36250800 | -2.55474000 |
| B | -2.71749400 | -1.73280700 | -1.72324700 |
| B | 0.00000000  | -1.76713800 | 1.59313600  |
| B | -2.34192400 | -1.38069200 | -0.13107900 |
| B | 1.72250800  | 2.70402800  | -0.95956600 |
| B | 2.34192400  | 1.38069200  | -0.13107900 |
| B | 2.34192400  | -1.38069200 | -0.13107900 |
| B | 2.36124700  | -0.87466100 | -3.02442700 |
| B | -2.36124700 | 0.87466100  | -3.02442700 |
| B | -0.87432000 | -2.35416700 | 0.35267900  |
| B | 2.36124700  | 0.87466100  | -3.02442700 |
| B | 2.62907000  | 0.00000000  | 0.65514400  |
| B | -1.72250800 | 2.70402800  | -0.95956600 |
| B | -0.87432000 | 2.35416700  | 0.35267900  |
| B | 0.87432000  | 2.35416700  | 0.35267900  |
| B | 1.39600200  | -2.36250800 | -2.55474000 |
| B | -1.39600200 | 2.36250800  | -2.55474000 |
| B | 1.39600200  | 2.36250800  | -2.55474000 |
| B | 1.40211500  | -0.90352200 | 1.25980800  |
| B | 1.40211500  | 0.90352200  | 1.25980800  |
| B | 2.71749400  | 1.73280700  | -1.72324700 |
| B | 0.88653000  | 1.39092500  | -3.88933000 |
| B | 0.00000000  | -2.63328100 | -3.32198600 |
| B | -2.36124700 | -0.87466100 | -3.02442700 |

|    |             |             |             |
|----|-------------|-------------|-------------|
| B  | -1.40211500 | -0.90352200 | 1.25980800  |
| B  | -1.40211500 | 0.90352200  | 1.25980800  |
| B  | -0.88653000 | 1.39092500  | -3.88933000 |
| B  | 1.72250800  | -2.70402800 | -0.95956600 |
| B  | -2.62907000 | 0.00000000  | 0.65514400  |
| B  | 0.88653000  | -1.39092500 | -3.88933000 |
| B  | -1.68190200 | 0.00000000  | -4.21391300 |
| B  | -1.72250800 | -2.70402800 | -0.95956600 |
| B  | -0.88653000 | -1.39092500 | -3.88933000 |
| C  | 1.21537500  | -0.70138400 | 4.64860600  |
| C  | 0.00000000  | -1.40086400 | 4.66368100  |
| C  | -1.21537500 | -0.70138400 | 4.64860600  |
| C  | -1.21537500 | 0.70138400  | 4.64860600  |
| C  | 0.00000000  | 1.40086400  | 4.66368100  |
| C  | 1.21537500  | 0.70138400  | 4.64860600  |
| H  | 2.15368800  | -1.24406100 | 4.62470000  |
| H  | 0.00000000  | -2.48509300 | 4.64808300  |
| H  | -2.15368800 | -1.24406100 | 4.62470000  |
| H  | -2.15368800 | 1.24406100  | 4.62470000  |
| H  | 0.00000000  | 2.48509300  | 4.64808300  |
| H  | 2.15368800  | 1.24406100  | 4.62470000  |
| Fe | 0.00000000  | 0.00000000  | 2.72879000  |

(7) C<sub>6</sub>H<sub>6</sub>CoB<sub>40</sub>

|   |             |             |             |
|---|-------------|-------------|-------------|
| B | 3.66696900  | 1.23962900  | 1.96211900  |
| B | 1.30674400  | -2.24359300 | 2.40483100  |
| B | 3.52837300  | -0.42665000 | 2.02507300  |
| B | -1.18555100 | -0.47868300 | -2.22878300 |
| B | -0.64436900 | 2.51982600  | -0.96516100 |
| B | 0.66209700  | 2.55699500  | 1.99573400  |
| B | 1.04420600  | -2.27035400 | -1.90482000 |
| B | 2.94607100  | 0.77281700  | -2.37044200 |
| B | 4.24615000  | 0.34456900  | -1.37089500 |
| B | 1.85739900  | -3.09603600 | -0.77666600 |
| B | 3.99500400  | -1.14699200 | -0.65431300 |
| B | -0.83413800 | 0.12725600  | 2.56672400  |
| B | -1.19458500 | -1.07637400 | 1.42094900  |
| B | -0.72668000 | -1.82096100 | -1.33214100 |
| B | -1.05695500 | 1.04279400  | -1.54731300 |
| B | 3.32342800  | 2.20380200  | 0.73316800  |
| B | 2.75345500  | -2.04576800 | -1.63263800 |
| B | -1.35113700 | 1.49031300  | 0.10006200  |
| B | -1.10713400 | -2.22591700 | 0.22885400  |
| B | 2.61883800  | 0.62164300  | 2.98265900  |



|    |             |             |             |
|----|-------------|-------------|-------------|
| B  | 1.97297600  | -0.83796000 | 2.87256400  |
| B  | 0.25258000  | -1.04196900 | 2.65886700  |
| B  | 0.15574400  | 0.36732800  | -2.74373600 |
| B  | 2.16017200  | 1.98975300  | 2.15892500  |
| B  | -0.62984600 | 1.58679100  | 1.78308600  |
| B  | 0.32406600  | -2.75951000 | -0.32638900 |
| B  | 0.02731200  | -2.30127700 | 1.39103300  |
| B  | -1.80520700 | 0.48569900  | 1.35545200  |
| B  | -0.03184600 | 2.65987200  | 0.53724600  |
| B  | 1.52541100  | 1.21691600  | -2.98399900 |
| B  | 3.61544200  | 1.75255200  | -0.94776200 |
| B  | 3.07567800  | -2.41600400 | 0.07522700  |
| B  | 2.78374400  | -1.96365800 | 1.76200000  |
| B  | 1.69769600  | 2.93172800  | 0.80422400  |
| B  | 0.08271200  | -1.30105100 | -2.73575100 |
| B  | 4.09301400  | -1.46968400 | 0.92655400  |
| B  | 0.41917500  | 1.95789800  | -2.06329500 |
| B  | 2.65581600  | 2.98808400  | -0.51989000 |
| B  | 3.52406700  | -0.77802000 | -2.23078700 |
| B  | 2.16218700  | 2.21176900  | -1.87176700 |
| C  | -4.44185200 | 0.45708500  | -1.20211700 |
| C  | -4.38379500 | -0.87569800 | -0.77757400 |
| C  | -4.80838500 | -1.20830800 | 0.51600100  |
| C  | -5.28852100 | -0.22240300 | 1.36695900  |
| C  | -5.34686800 | 1.10279300  | 0.93869300  |
| C  | -4.91988700 | 1.44335700  | -0.33768300 |
| H  | -4.16063400 | 0.71432100  | -2.21802800 |
| H  | -4.11517700 | -1.65927800 | -1.48060200 |
| H  | -4.77334300 | -2.24288300 | 0.84296000  |
| H  | -5.61911600 | -0.48470900 | 2.36711500  |
| H  | -5.72490300 | 1.87103000  | 1.60622900  |
| H  | -4.96765100 | 2.47491700  | -0.67206000 |
| Co | -2.03884100 | -0.43304500 | -0.41353000 |

(8) C<sub>6</sub>H<sub>6</sub>NiB<sub>40</sub>

|   |             |             |             |
|---|-------------|-------------|-------------|
| B | 3.65563500  | 0.99303000  | 2.10814800  |
| B | 1.32238000  | -2.53619800 | 2.08962700  |
| B | 3.53050700  | -0.66731000 | 1.95350000  |
| B | -1.15062000 | -0.18120200 | -2.27885800 |
| B | -0.65411900 | 2.62029400  | -0.63687500 |
| B | 0.64968500  | 2.29623800  | 2.31088000  |
| B | 1.06517600  | -2.00647400 | -2.17765500 |
| B | 2.95048400  | 1.09590100  | -2.24107000 |
| B | 4.24621500  | 0.54302700  | -1.30279600 |

|    |             |             |             |
|----|-------------|-------------|-------------|
| B  | 1.88429100  | -2.96432800 | -1.16607700 |
| B  | 4.00507200  | -1.02948800 | -0.78565000 |
| B  | -0.82685500 | -0.21165500 | 2.55351300  |
| B  | -1.16449100 | -1.25632900 | 1.25296900  |
| B  | -0.68813500 | -1.62966200 | -1.54908700 |
| B  | -1.06554600 | 1.24571500  | -1.42586800 |
| B  | 3.30974100  | 2.10976900  | 1.01625200  |
| B  | 2.76770900  | -1.80305900 | -1.87707000 |
| B  | -1.36983000 | 1.47638200  | 0.29272000  |
| B  | -1.09766900 | -2.27117700 | -0.06750100 |
| B  | 2.60494300  | 0.24212300  | 3.03130300  |
| B  | 1.97091300  | -1.19596600 | 2.73510800  |
| B  | 0.25792600  | -1.38646200 | 2.49180900  |
| B  | 0.18073100  | 0.73021400  | -2.68387500 |
| B  | 2.14853900  | 1.70787900  | 2.39459600  |
| B  | -0.62526800 | 1.34755500  | 1.97635700  |
| B  | 0.34187800  | -2.71344200 | -0.67192000 |
| B  | 0.04197900  | -2.48665800 | 1.06771500  |
| B  | -1.78683200 | 0.30553100  | 1.39875900  |
| B  | -0.04228700 | 2.56857000  | 0.87078700  |
| B  | 1.53428800  | 1.61858400  | -2.80682500 |
| B  | 3.60856800  | 1.88376200  | -0.70525300 |
| B  | 3.09894000  | -2.39252900 | -0.23262200 |
| B  | 2.79969600  | -2.16425200 | 1.49621800  |
| B  | 1.68438500  | 2.82092300  | 1.17411300  |
| B  | 0.11175100  | -0.93254000 | -2.88280300 |
| B  | 4.11120200  | -1.56260200 | 0.73789100  |
| B  | 0.41860300  | 2.21499800  | -1.79301800 |
| B  | 2.64902300  | 3.05780800  | -0.12455700 |
| B  | 3.52738300  | -0.46100700 | -2.30029000 |
| B  | 2.15808000  | 2.45815700  | -1.56383100 |
| C  | -4.63686500 | 0.51209800  | -1.18666100 |
| C  | -4.44878000 | -0.82503700 | -0.83004700 |
| C  | -4.75988300 | -1.24714000 | 0.46497600  |
| C  | -5.24602800 | -0.33676500 | 1.39602400  |
| C  | -5.42901700 | 0.99598100  | 1.03627200  |
| C  | -5.12538700 | 1.42068900  | -0.25226100 |
| H  | -4.41615700 | 0.83748900  | -2.19850000 |
| H  | -4.13212000 | -1.54860700 | -1.57596100 |
| H  | -4.62421400 | -2.28883500 | 0.73952500  |
| H  | -5.48548500 | -0.66589300 | 2.40253500  |
| H  | -5.81122300 | 1.70521600  | 1.76437500  |
| H  | -5.27046000 | 2.45962300  | -0.53179600 |
| Ni | -1.90017600 | -0.39423400 | -0.45585100 |
